# Supplementary material for: Isolation and characterization of a novel lytic bacteriophage Pv27 with biocontrol potential against Vibrio parahaemolyticus infections in shrimp
Source: PeerJ journal article supplement (doi:10.7717/peerj.19421), 2025-05-06

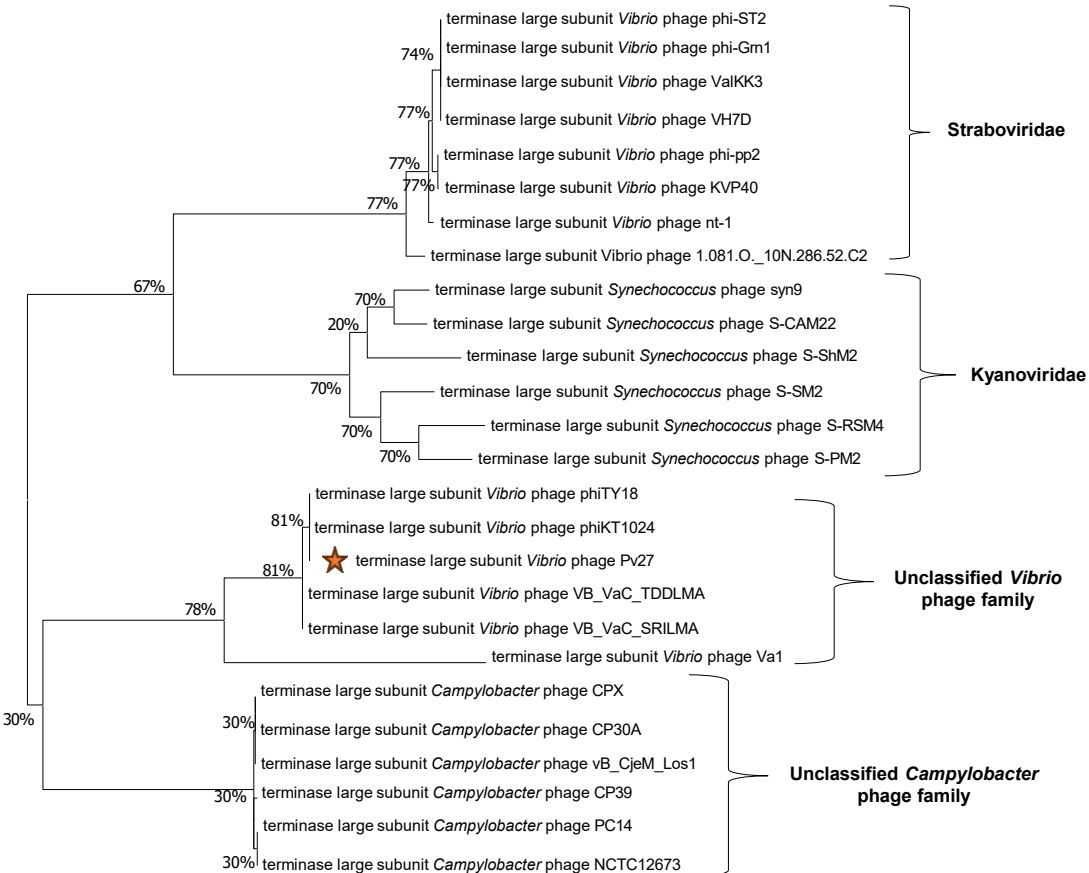

Supplement: Figure_S3.pdf [file Figure_S3.pdf]
