# Supplementary material for: Isolation and characterization of a novel lytic bacteriophage Pv27 with biocontrol potential against Vibrio parahaemolyticus infections in shrimp
Source: PeerJ. 2025 May 6;13:e19421. doi: 10.7717/peerj.19421 (PMC12063606; doi:10.7717/peerj.19421)
Supplement: Supplemental Information 6 [file peerj-13-19421-s006.xlsx]

## Sheet: MOI
MOI	Volumn inoculated (mL)	Dilution	Number of plaques			PFU/mL
			Data 1	Data 2	Data 3	Data 1	Data 2	Data 3
0.001	10	1e-09	50	52	62	500000000000	520000000000	620000000000
0.01	10	1e-07	98	94	91	9800000000	9400000000	9100000000
0.1	10	1e-08	30	35	36	30000000000	35000000000	36000000000
1	10	1e-07	82	85	86	8200000000	8500000000	8600000000
10	10	1e-08	72	70	64	72000000000	70000000000	74000000000
100	10	1e-08	90	92	85	90000000000	92000000000	85000000000

## Sheet: One-step grow curve
Time (minute)	Volumn inoculated (mL)	Dilution	Number of plaques			PFU/mL						4
			Data 1	Data 2	Data 3	Data 1	Data 2	Data 3
0	10	0.1	100	141	132	10000	14100	13200
5	10	0.1	130	150	215	13000	15000	21500
10	10	0.1	158	138	190	15800	13800	19000
15	10	0.01	42	38	32	42000	38018.9	32000
20	10	0.01	32	23	18	32000	23000	18000
25	10	0.1	220	182	170	22000	18197	17000
30	10	0.001	36	32	45	360000	320000	450000
40	10	0.001	178	145	166	1.77828e+06	1.44544e+06	1.65959e+06
50	10	1e-05	32	22	30	32000000	22000000	30000000
60	10	1e-06	93	80	115	930000000	800000000	1150000000
70	10	1e-06	161	172	195	1610000000	1720000000	1950000000
80	10	1e-06	190	209	220	1900000000	2090000000	2200000000

## Sheet: pH test
pH	Volumn inoculated (mL)	Dilution	Number of plaques			PFU/mL
			Data 1	Data 2	Data 3	Data 1	Data 2	Data 3
2	10	0	0	0	0	0	0	0
3	10	0.01	148	117	158	147911	117490	158489
5	10	0.0001	51	38	35	5100000	3.80189e+06	3500000
7	10	0.0001	39	38	32	3900000	3.80189e+06	3200000
9	10	0.0001	27	29	25	2700000	2900000	2500000
11	10	0.001	120	138	110	1.20226e+06	1.38038e+06	1.09648e+06
12	10	0	0	0	0	0	0	0

## Sheet: Temperature test
Temperature (℃)	Volumn inoculated (mL)	Dilution	Number of plaques			PFU/mL
			Data 1	Data 2	Data 3	Data 1	Data 2	Data 3
4	10	1e-06	42	39	45	420000000	390000000	450000000
20	10	1e-06	48	50	51	480000000	500000000	510000000
37	10	1e-06	49	46	56	4.89779e+08	460000000	560000000
50	10	1e-05	62	48	72	62000000	48000000	72000000
60	10	0.0001	20	21	26	2000000	2100000	2600000
70	10	0	0	0	0	0	0	0

## Sheet: Sanility test
Salinity (%)	Volumn inoculated (mL)	Dilution	Number of plaques			PFU/mL
			Data 1	Data 2	Data 3	Data 1	Data 2	Data 3
1.5	10	0.0001	56	50	69	5600000	5000000	6900000
3	10	0.0001	54	38	55	5400000	3800000	5500000
5	10	0.0001	50	60	66	5000000	6000000	6600000
10	10	0.0001	45	49	52	4500000	4900000	5200000

## Sheet: Lytic activity
Time (hours)	MOI	OD600
		Data 1	Data 2	Data 3
0	0.001	0.13	0.134	0.113
	0.1	0.116	0.131	0.136
	1	0.136	0.132	0.113
	10	0.127	0.12	0.102
	100	0.118	0.123	0.109
	Bacterial control	0.136	0.133	0.135
	Phage control	0.107	0.099	0.1
2	0.001	0.18	0.202	0.165
	0.1	0.152	0.184	0.164
	1	0.192	0.173	0.196
	10	0.181	0.172	0.189
	100	0.142	0.127	0.155
	Bacterial control	0.326	0.328	0.367
	Phage control	0.105	0.104	0.104
4	0.001	0.173	0.162	0.158
	0.1	0.196	0.181	0.189
	1	0.181	0.171	0.176
	10	0.168	0.145	0.15
	100	0.151	0.173	0.154
	Bacterial control	0.532	0.554	0.556
	Phage control	0.103	0.104	0.109
6	0.001	0.169	0.198	0.154
	0.1	0.197	0.18	0.186
	1	0.158	0.156	0.168
	10	0.175	0.172	0.166
	100	0.163	0.157	0.145
	Bacterial control	0.807	0.789	0.768
	Phage control	0.102	0.114	0.109
8	0.001	0.166	0.173	0.158
	0.1	0.151	0.135	0.145
	1	0.143	0.141	0.15
	10	0.161	0.169	0.123
	100	0.16	0.188	0.15
	Bacterial control	1.086	1.085	1.066
	Phage control	0.102	0.112	0.103
10	0.001	0.109	0.201	0.29
	0.1	0.186	0.197	0.181
	1	0.187	0.226	0.215
	10	0.198	0.223	0.219
	100	0.152	0.231	0.24
	Bacterial control	0.185	1.187	1.168
	Phage control	0.103	0.112	0.108
12	0.001	0.299	0.309	0.289
	0.1	0.346	0.327	0.35
	1	0.289	0.265	0.288
	10	0.231	0.245	0.209
	100	0.262	0.259	0.242
	Bacterial control	1.254	1.255	1.246
	Phage control	0.105	0.104	0.103
14	0.001	0.366	0.378	0.364
	0.1	0.436	0.422	0.43
	1	0.336	0.323	0.325
	10	0.28	0.273	0.259
	100	0.295	0.282	0.276
	Bacterial control	1.262	1.258	1.269
	Phage control	0.102	0.103	0.102
16	0.001	0.499	0.409	0.469
	0.1	0.556	0.567	0.59
	1	0.389	0.365	0.388
	10	0.331	0.345	0.309
	100	0.362	0.359	0.342
	Bacterial control	1.241	1.245	1.24
	Phage control	0.103	0.104	0.105
18	0.001	0.612	0.605	0.621
	0.1	0.773	0.769	0.762
	1	0.728	0.699	0.726
	10	0.652	0.648	0.616
	100	0.603	0.608	0.629
	Bacterial control	1.23	1.235	1.238
	Phage control	0.106	0.105	0.103
20	0.001	0.632	0.638	0.643
	0.1	0.796	0.808	0.799
	1	0.778	0.786	0.762
	10	0.692	0.699	0.686
	100	0.663	0.678	0.669
	Bacterial control	1.198	1.192	1.206
	Phage control	0.108	0.104	0.103
22	0.001	0.679	0.668	0.651
	0.1	0.813	0.818	0.822
	1	0.746	0.759	0.756
	10	0.702	0.719	0.706
	100	0.698	0.686	0.692
	Bacterial control	1.162	1.186	1.165
	Phage control	0.102	0.104	0.103
24	0.001	0.666	0.699	0.663
	0.1	0.819	0.828	0.811
	1	0.76	0.778	0.756
	10	0.708	0.722	0.718
	100	0.712	0.699	0.711
	Bacterial control	1.16	1.166	1.169
	Phage control	0.102	0.103	0.103
